# Supplementary material for: XCR1+ dendritic cells promote memory CD8+ T cell recall upon secondary infections with Listeria monocytogenes or certain viruses
Source: PubMed Central journal article supplement — J Exp Med. 2016 Jan 11;213(1):75–92. doi: 10.1084/jem.20142350 (PMC4710197; doi:10.1084/jem.20142350), 2016-01-11
Supplement: supp_jem.20142350_JEM_20142350_sm.pdf [file supp_jem.20142350_JEM_20142350_sm.pdf]

SUPPLEMENTAL MATERIAL

Alexandre et al., <http://www.jem.org/cgi/content/full/jem.20142350/DC1>

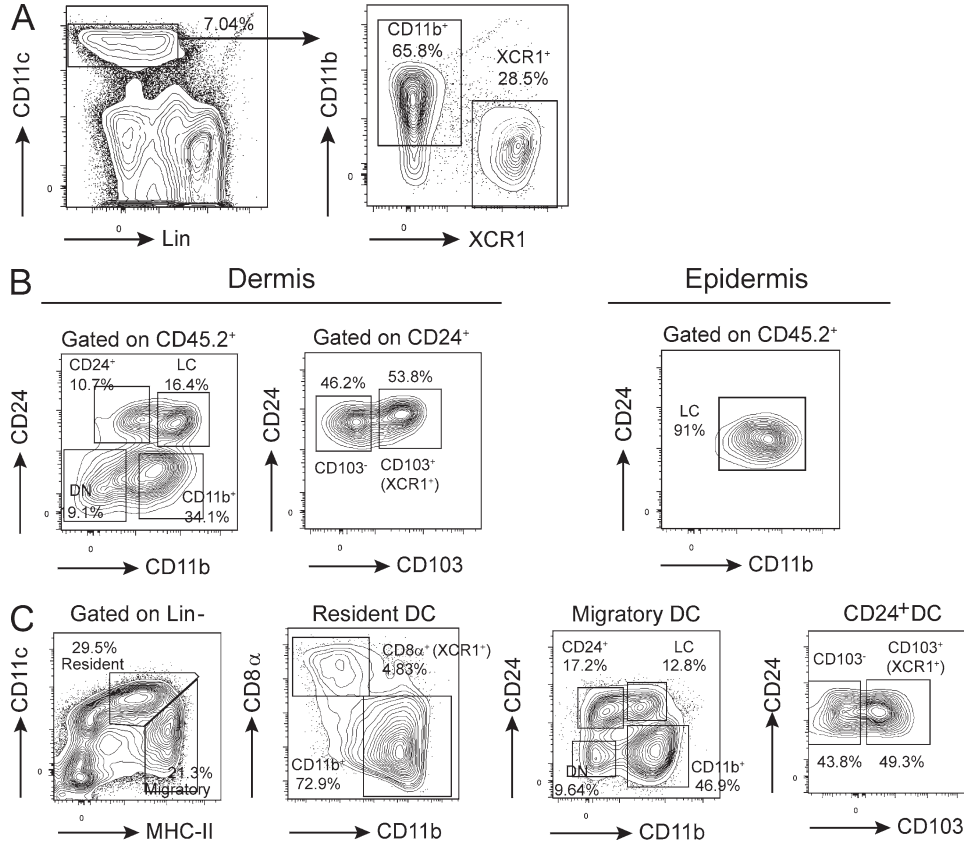

Figure S1. **Gating strategies used to examine the tdTomato expression in DCs of *Karma* mice.** (A) Gating strategy applied to examine the tdTomato expression by DCs in spleen of *Karma* mice. In spleen, Lin<sup>-</sup>CD11c<sup>hi</sup> cells are divided into CD11b<sup>+</sup>XCR1<sup>-</sup> DCs and CD11b<sup>-</sup>XCR1<sup>+</sup> or XCR1<sup>+</sup> DCs. One experiment representative of five, each with three mice per group, is shown. (B) Gating strategy applied to examine the tdTomato expression by DCs in the skin of *Karma* mice. Immune cells extracted from the skin are defined as CD45.2<sup>+</sup> cells. The epidermis harbors only Langerhans cells (LC), whereas the dermis includes four distinct DC subsets besides LC en route to the CLNs. (C) Gating strategy applied to examine the tdTomato expression by the lymphoid-resident conventional and migrating DCs subsets in the CLNs of *Karma* mice. This gating was applied on Lin<sup>-</sup> (CD3e<sup>-</sup>CD19<sup>-</sup>NK1.1<sup>-</sup>) cells. For skin and CLN, one experiment representative of three with three mice per group is shown.

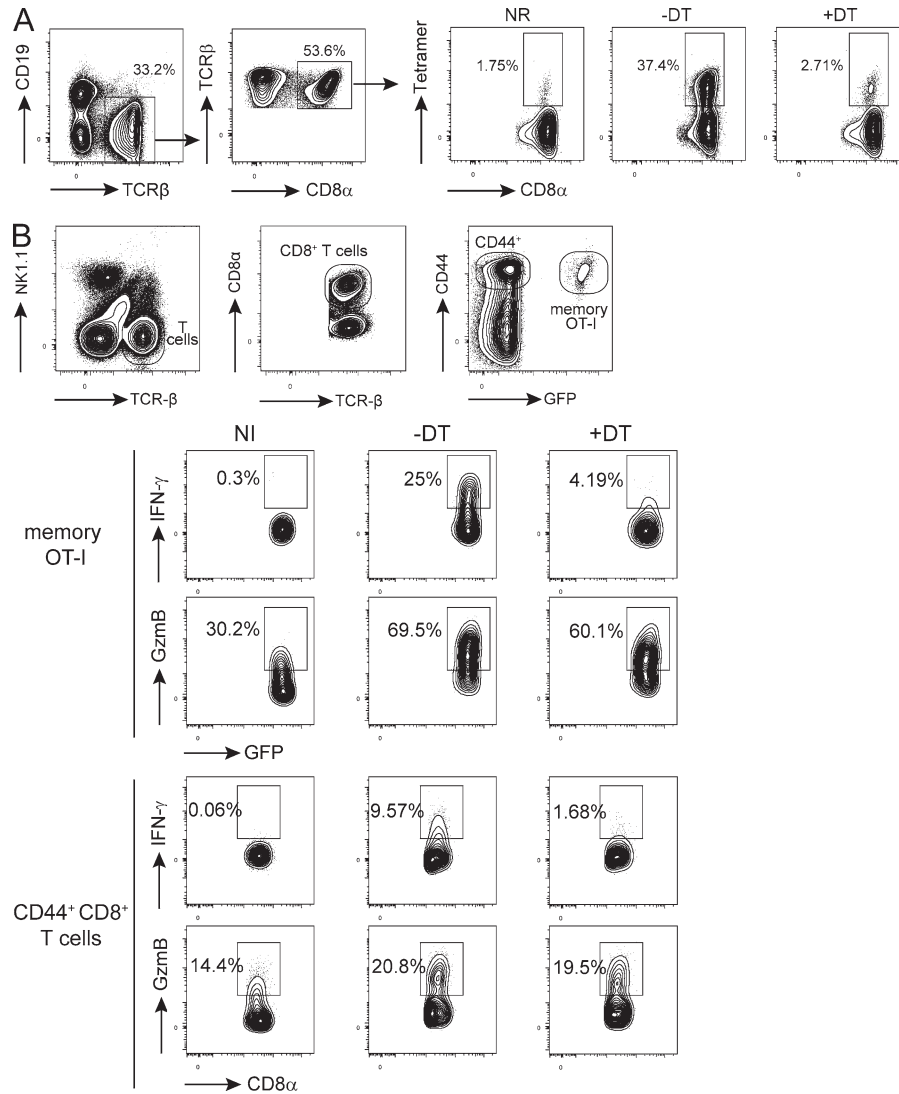

Figure S2. **Analysis of mCTL activation upon secondary challenge with *Lm-OVA*.** (A) Tetramer staining of splenocytes from memory mice 5 d after secondary challenge with *Lm-OVA*. This gating strategy was used for Fig. 3. (B) Analysis of IFN- $\gamma$  production and granzyme B induction in OT-I mCTLs and polyclonal CD44<sup>hi</sup> mCTLs 6 h after *Lm-OVA* secondary infection. One representative experiment out of seven, each with at least three mice per group, is shown.

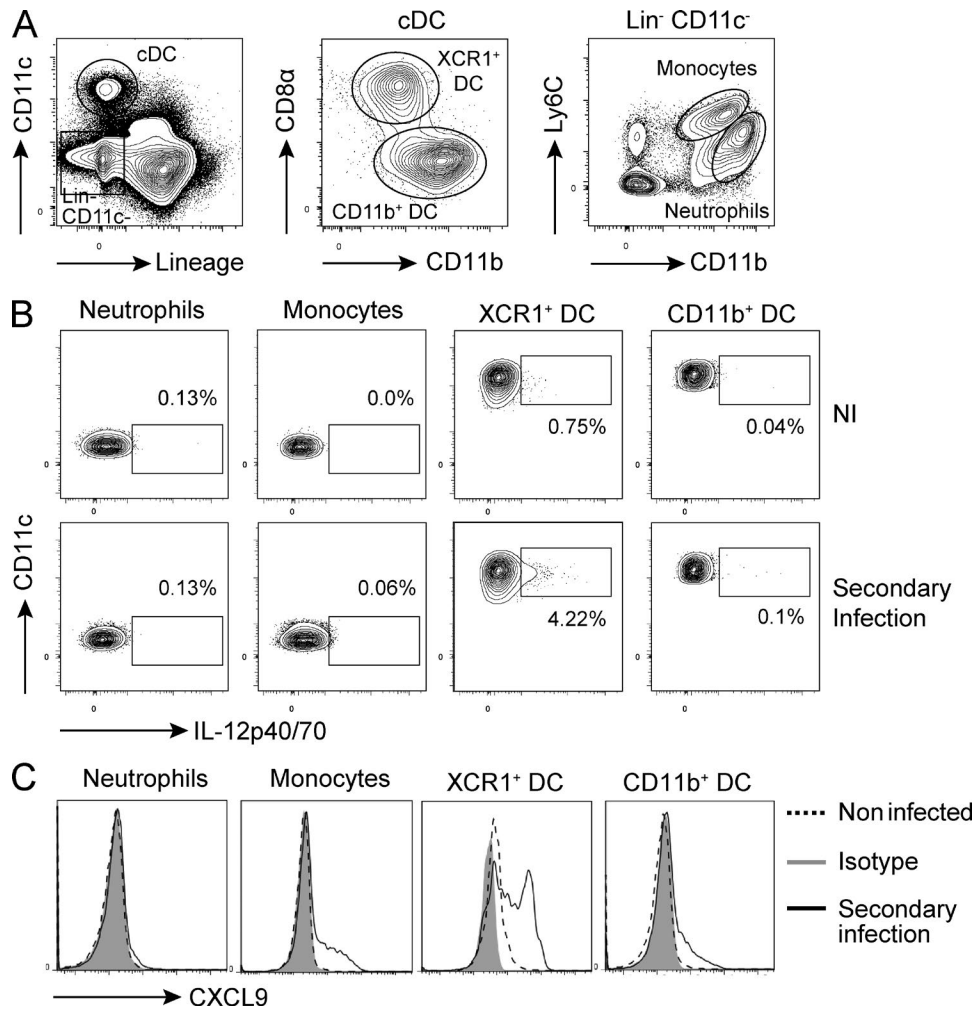

Figure S3. IL-12 and CXCL9 expression analysis in DCs, monocytes, and neutrophils in spleens of infected animals. (A) Gating strategy applied to identify splenic XCR1<sup>+</sup> DCs, CD11b<sup>+</sup> DCs, monocytes and neutrophils in infected animals. One experiment representative of three, each with three mice per group, is shown. (B) Example of IL-12p40/70 staining of splenic DCs, monocytes, and neutrophils of memory mice after *Lm-OVA* secondary infection. One experiment representative of three, with three mice per group is shown. (C) Example of CXCL9 staining of splenic DCs, monocytes, and neutrophils of memory mice 6 h after *Lm-OVA* secondary infection. Histogram overlays are from one experiment representative of two, with three mice per group.

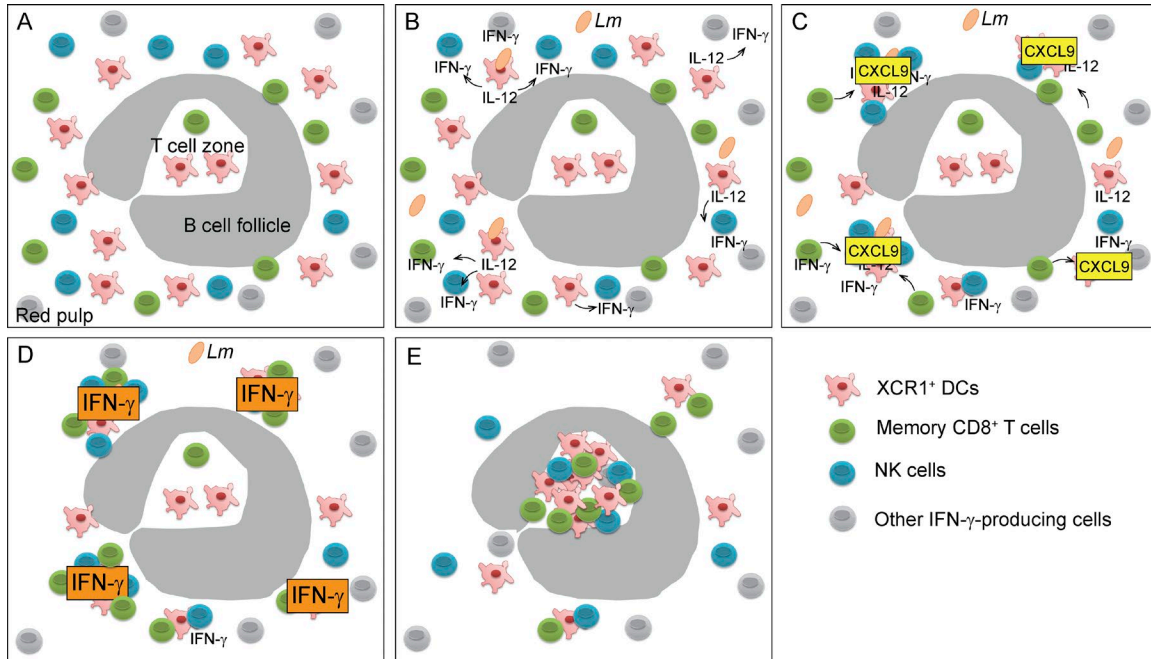

Figure S4. **Schematic model of the recall of mCTLs by XCR1<sup>+</sup> DCs.** (A) In memory mice, XCR1<sup>+</sup> DCs reside in the red pulp and the T cell zone whereas NK cells and mCTLs mostly reside in the red pulp. (B) Upon secondary infection with *Lm-OVA*, XCR1<sup>+</sup> DCs respond swiftly by producing IL-12, which initiates the early production of IFN- $\gamma$  by NK, mCTLs, and other cells. (C) NK cells and most likely other IFN- $\gamma$  producers are attracted toward XCR1<sup>+</sup> DCs, and the early IFN- $\gamma$  acts on XCR1<sup>+</sup> DCs amplifying IL-12 and triggering CXCL9 production. The engagement of the receptor for CXCL9, CXCR3, on RP-residing mCTLs further triggers their mobilization toward the edges of the marginal zone into cell clusters encompassing XCR1<sup>+</sup> DCs and NK cells. (D) The formation of these cell clusters enhances the induction of IFN- $\gamma$  locally for a few hours, generating a positive feedback loop enhancing the production of IL-12 and CXCL9. (E) By 24 h, both XCR1<sup>+</sup> DCs, some NK cells and mCTLs migrate into the T cell zone most likely through the bridging channel.

Table S1. **Antibodies used in this study**

| Antibody              | Clones     | Species             | Experiment     |
|-----------------------|------------|---------------------|----------------|
| B220                  | RA3-6B2    | Rat                 | FC; IF         |
| CCL3                  | Polyclonal | Goat                | FC             |
| CD3 <sub>e</sub>      | 145-2c11   | Armenian Hamster    | FC             |
| CD3 <sub>e</sub>      | 500A2      | Gold Syrian Hamster | FC             |
| CD4                   | RM4-5      | Rat                 | FC             |
| CD8 $\alpha$          | 53-6.7     | Rat                 | FC             |
| CD11b                 | M1/70      | Rat                 | FC; IF         |
| CD11c                 | N418       | Rat                 | FC             |
| CD19                  | 1D3        | Rat                 | FC             |
| CD24                  | M1/69      | Rat                 | FC             |
| CD103                 | 2E7        | Armenian Hamster    | FC             |
| CXCL9                 | MIG-2F5.5  | Armenian Hamster    | FC; IF         |
| CXCR3                 | CXCR3-173  | Armenian Hamster    | FC; neutra     |
| F4/80                 | BM8        | Rat                 | FC             |
| FITC                  | Polyclonal | Rabbit              | IF             |
| GFP                   | Polyclonal | Rabbit              | IF             |
| granzyme B            | GB11       | Mouse               | FC             |
| GR1                   | RB6-8C5    | Rat                 | FC             |
| IFN- $\gamma$         | XMG1.2     | Rat                 | FC; IF; neutra |
| IL-12p40/70           | C15.6      | Rat                 | FC             |
| IL-12p40/70           | C17.8      | Rat                 | neutra         |
| Isotype CXCR3         | Polyclonal | Armenian Hamster    | neutra         |
| Isotype IL-12         | 2A3        | Rat                 | neutra         |
| Isotype IFN- $\gamma$ | HRPN       | Rat                 | neutra         |
| Ly6C                  | AL-21      | Rat                 | FC             |
| Ly6G                  | 1A8        | Rat                 | FC             |
| MHC-II                | AF6-120.1  | Mouse               | FC             |
| NK1.1                 | PK136      | Mouse               | FC; depl       |
| NKp46                 | 29A1.4     | Goat                | IF             |
| dsRed/RFP/tdTomato    | Polyclonal | Rabbit              | IF             |
| SIGLEC-H              | 551        | Rat                 | FC             |
| SIRP $\alpha$         | P84        | Rat                 | FC             |
| TCR- $\beta$          | H57-597    | Armenian Hamster    | FC             |
| XCR1                  | ZET        | Mouse               | FC             |
| Rabbit IgG            | Secondary  | Donkey              | IF             |
| Armenian Hamster IgG  | Secondary  | Goat                | IF             |
| Goat IgG              | Secondary  | Donkey              | IF             |

depl, depletion; FC, flow cytometry; IF, immunofluorescence; neutra, neutralization.
